# Supplementary material for: Large-scale characterization of drug mechanism of action using proteome-wide thermal shift assays
Source: eLife journal article supplement (doi:10.7554/elife.95595), 2024-03-26
Supplement: fig2-data3 [file elife-95595-fig2-data3-v1.zip]

**A**

HCT116 cells  
Palbociclib (μM): — 0.1 1 10 — — —  
BI-2536 (μM): — — — — 0.1 1 10

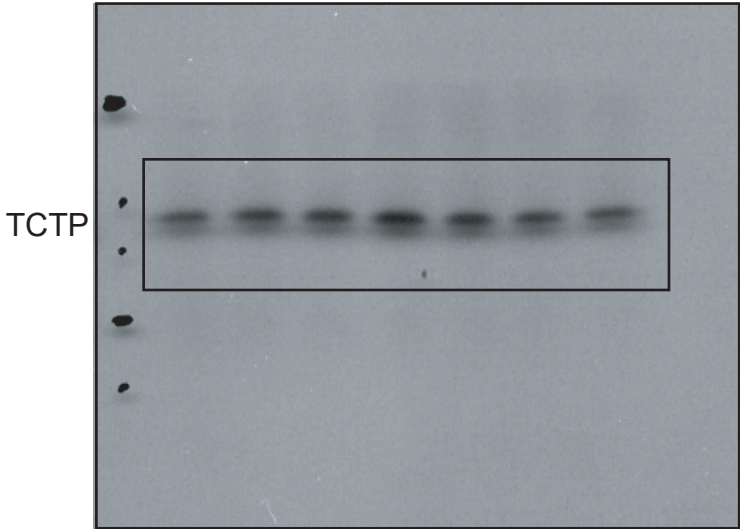

**B**

HCT116 cells  
Palbociclib (μM): — 0.1 1 10 — — —  
BI-2536 (μM): — — — — 0.1 1 10

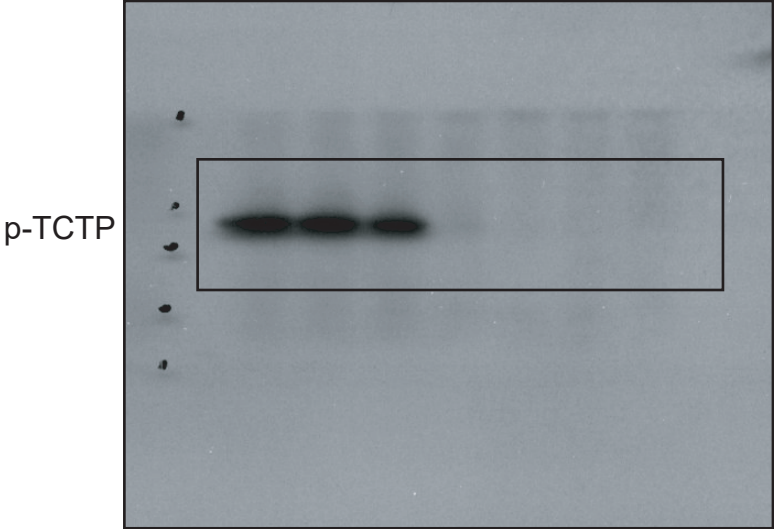

Figure 2F. Unedited scans of TCTP (A) and pTCTP (B).
