# Supplementary material for: Large-scale characterization of drug mechanism of action using proteome-wide thermal shift assays
Source: eLife journal article supplement (doi:10.7554/elife.95595), 2024-03-26
Supplement: fig4-data2 [file elife-95595-fig4-data2-v1.zip]

**A**

| HCT116 cells              | +TSZ |   |     |   |    |     |   |    |     |   |          |
|---------------------------|------|---|-----|---|----|-----|---|----|-----|---|----------|
| Necrostatin-2 ( $\mu$ M): | —    | — | 0.1 | 1 | 10 | —   | — | —  | —   | — | —        |
| GSK2505414 ( $\mu$ M):    | —    | — | —   | — | —  | 0.1 | 1 | 10 | —   | — | —        |
| AZD-5438 ( $\mu$ M):      | —    | — | —   | — | —  | —   | — | —  | 0.1 | 1 | 10       |
| Tozasertib ( $\mu$ M):    | —    | — | —   | — | —  | —   | — | —  | —   | — | 0.1 1 10 |

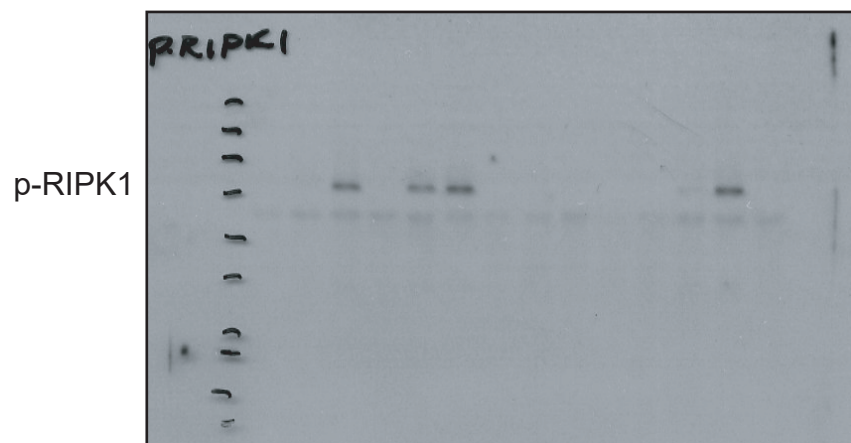**B**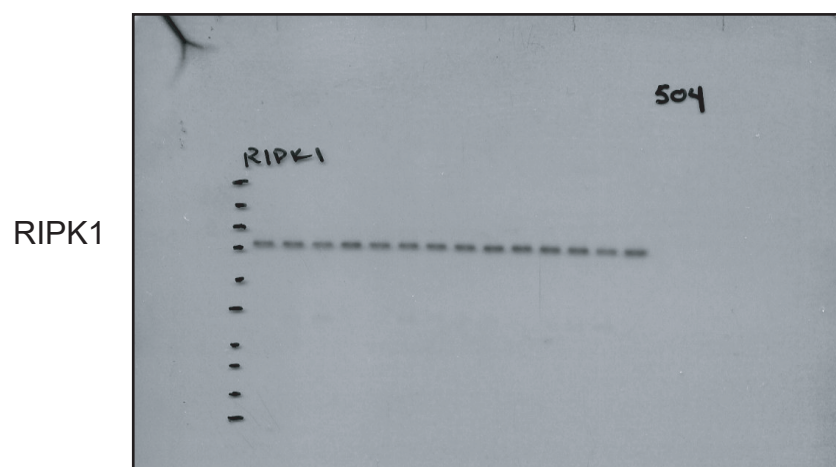

Figure 4G. Unedited scans of pRIPK1 (A) and RIPK1 (B).
