# Supplementary material for: Large-scale characterization of drug mechanism of action using proteome-wide thermal shift assays
Source: eLife journal article supplement (doi:10.7554/elife.95595), 2024-03-26
Supplement: fig5-data2 [file elife-95595-fig5-data2-v1.pdf]

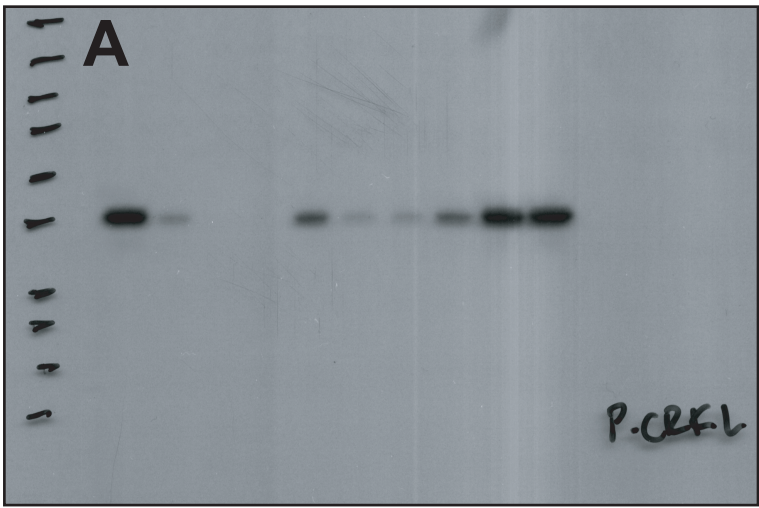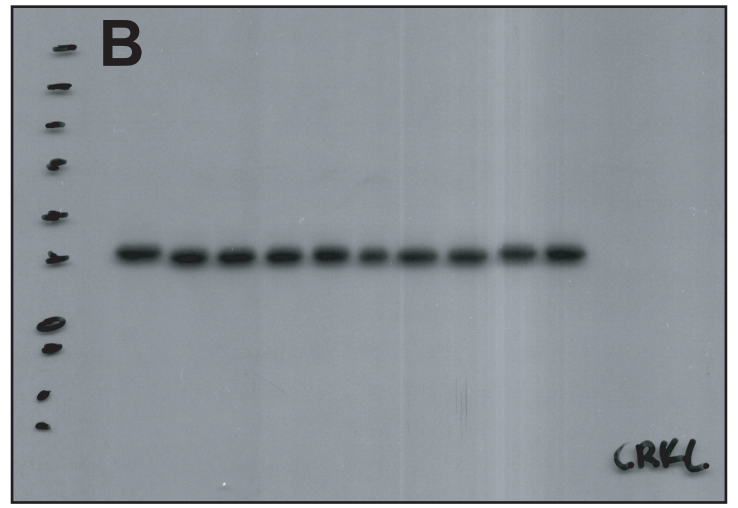

Figure 5C. Unedited scans of pCRKL (A) and CRKL (B).

Figure 5 - source data 1
